# Supplementary material
Source: publisher figshare collection journal article supplement (https://karger.figshare.com/ndownloader/files/30626514)
Supplement: Supplementary file 1 [file 30626514]

## Supplementary File 3: Likert Scale agreement scoring

Mean scores for agreement were calculated for each question, and the number of disagreeing outlier responses by ≥2 Likert points from the mean score were calculated. Each statement was then classified as reaching consensus (mean score ≥6 [agree] or ≤4 [disagree] with ≤1 outlier), near-consensus (mean score 4–6 with ≤2 outliers), or no-consensus (≥3 outliers regardless of score). Authors were then asked to consider near or no-consensus questions to determine if the statements could be refined or omitted. Final consensus as to the recommendations and inclusion/exclusion of statements was achieved prior to submission for publication.
